# Supplementary material
Source: publisher site journal article supplement (https://www.dovepress.com/article/503181)
Supplement: Supplementary file 1 [file get_supplementary_file.php]

Supplementary figures


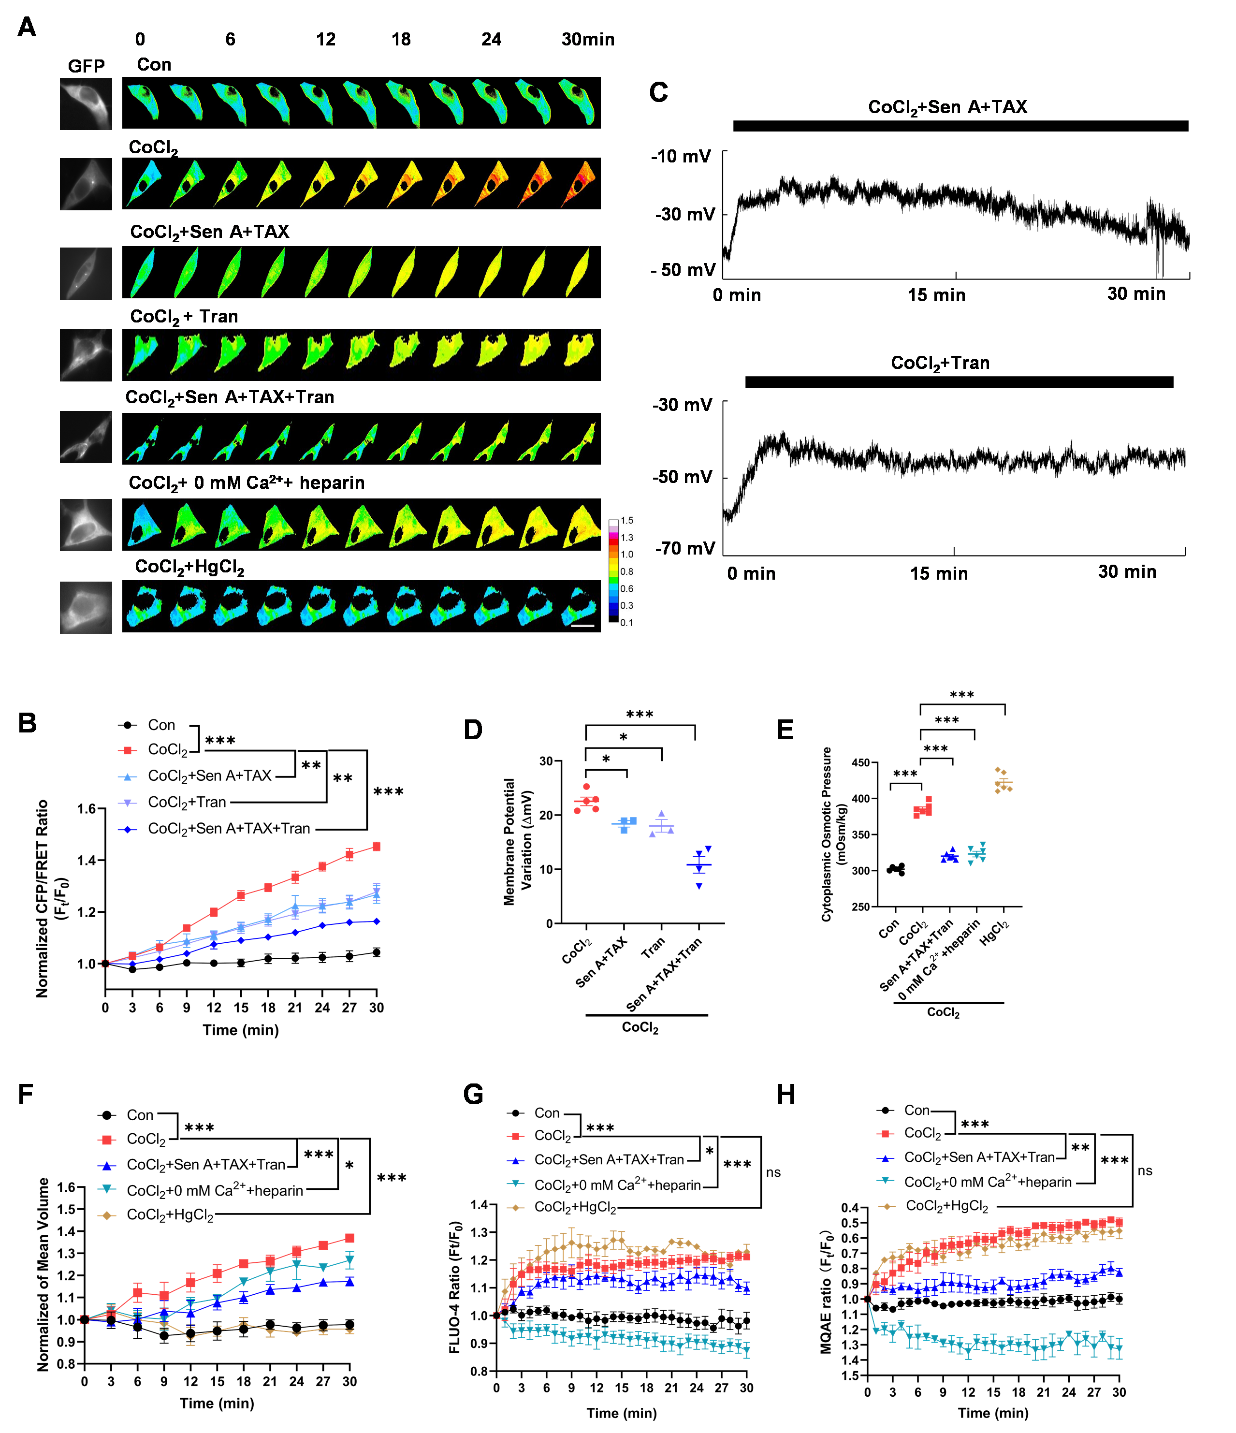


**Figure S1. CoCl2 induces changes in osmosis and cell membrane potential dependent on PNs and Ca2+.** Neuronal cells were treated with CoCl2 (200 μM), Sen A (100 μM) + TAX (10 μM), Tran (20 μM), 0 mM Ca2+ (no extracellular Ca2+), heparin (0.5 mg/mL), and HgCl2 (200 μM). **(A, B)** Representative fluorescent images and normalized CFP/FRET ratio of vimentin IF tension, corresponding to Figure 6A.Scale bar, 10 µm.The calibration bar was set from 0.1 to 1.5. The significant differences were statistically analyzed between the CoCl2 group compared with the control, the additional treatment of Sen A+TAX or Tran or Sen A+TAX+Tran individually compared with the CoCl2 group. **(C, D)** Representative trace map and variations in membrane potential. The significant differences were statistically analyzed between the additional treatment of Sen A+TAX or Tran or Sen A+TAX+Tran individually compared with the CoCl2 group. **(E)** Cytoplasmic OP. **(F)** Normalized ratio of cell volume. **(G, H)** Normalized Ft/F0 ratio of intracellular Ca2+ and Cl− fluorescent intensities. The significant differences were statistically analyzed between the CoCl2 group compared with the control, the additional treatment of Sen A+TAX+Tran or 0 mM Ca2++heparin or HgCl2 individually compared with the CoCl2 group (E-H). Average of ≥3 biologically independent replicates ± SEM. ns, no significant, *p < 0.05, **p < 0.01, ***p < 0.001.


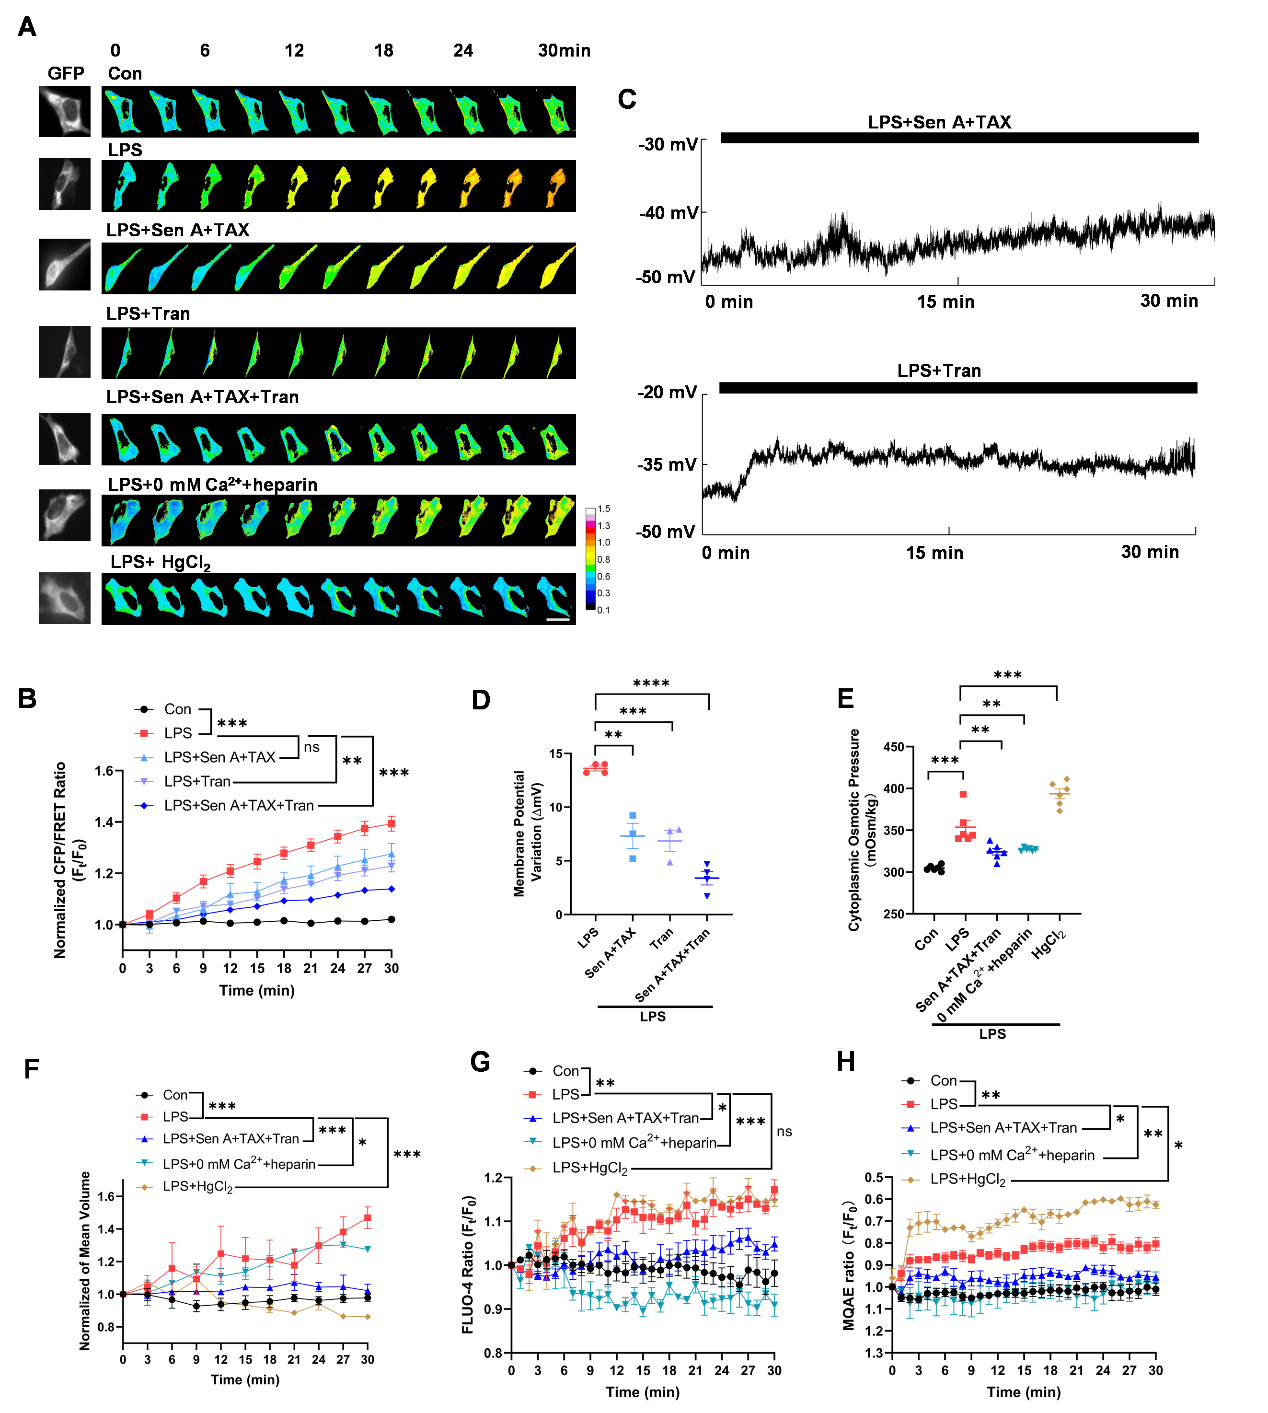


**Figure S2. LPS induces changes in osmosis and cell membrane potential associated with PNs and Ca2+.** Neuronal cells were treated with LPS (1 μg/mL), Sen A (100 μM) + TAX (10 μM), Tran (20 μM), 0 mM Ca2+ (no extracellular Ca2+), heparin (0.5 mg/mL), and HgCl2 (200 μM). **(A, B)** Representative fluorescent images and normalized CFP/FRET ratio of vimentin IF tension, corresponding to Figure 6A.Scale bar, 10 µm.The calibration bar was set from 0.1 to 1.5. The significant differences were statistically analyzed between the LPS group compared with the control, the additional treatment of Sen A+TAX or Tran or Sen A+TAX+Tran individually compared with the LPS group. **(C, D)** Representative trace map and variations in membrane potential. The significant differences were statistically analyzed between the additional treatment of Sen A+TAX or Tran or Sen A+TAX+Tran individually compared with the LPS group. **(E)** Cytoplasmic OP. **(F)** Normalized ratio of cell volume. **(G, H)** Normalized Ft/F0 ratio of intracellular Ca2+ and Cl− fluorescent intensities. The significant differences were statistically analyzed between the LPS group compared with the control, the additional treatment of Sen A+TAX+Tran or 0 mM Ca2++heparin or HgCl2 individually compared with the LPS group (E-H). Average of ≥3 biologically independent replicates ± SEM. ns, no significant, *p < 0.05, **p < 0.01, ***p < 0.001.


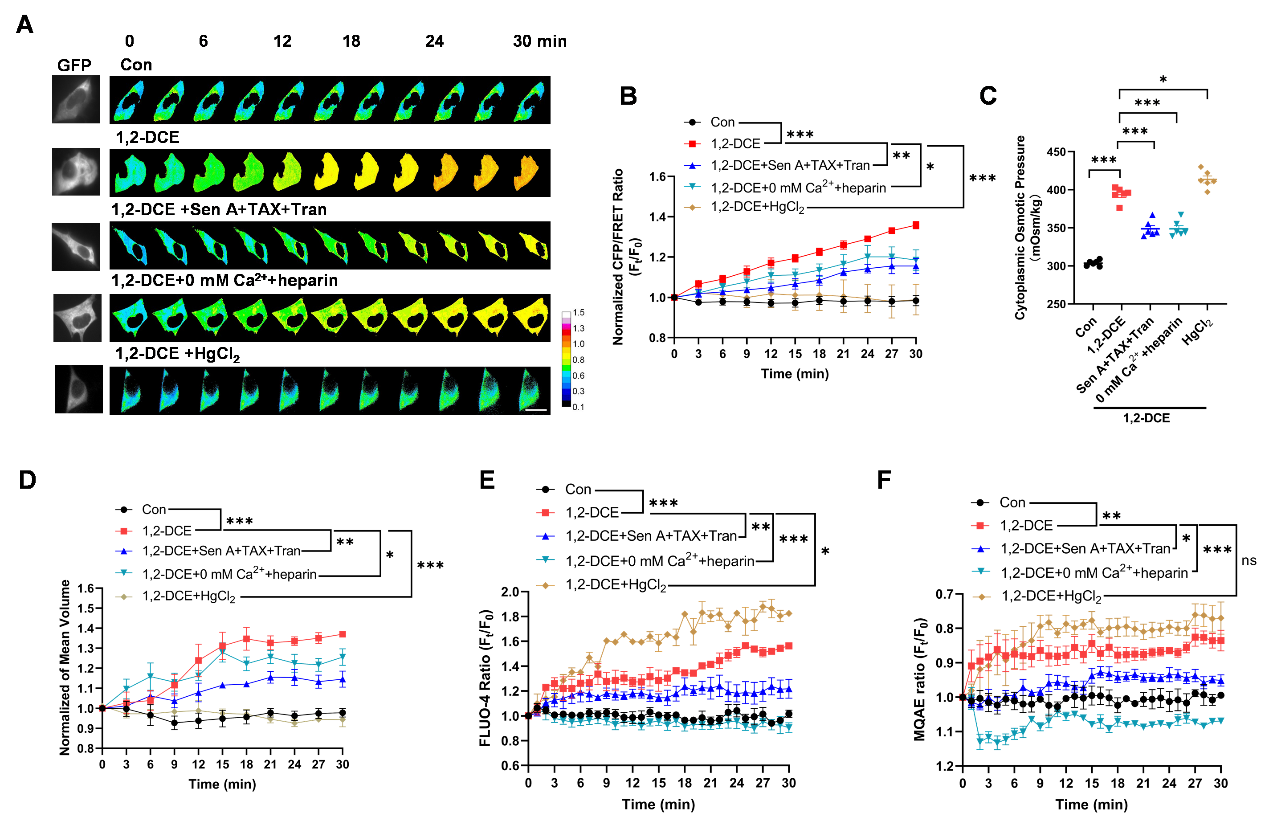


**Figure S3. 1,2-DCE induces changes in IF tension and intracellular osmosis.** Neuronal cells were treated with 1,2-DCE (1.2 μg/mL), Sen A (100 μM) + TAX (10 μM), Tran (20 μM), 0 mM Ca2+ (no extracellular Ca2+), heparin (0.5 mg/mL), and HgCl2 (200 μM). **(A, B)** Representative fluorescent images and normalized CFP/FRET ratio of vimentin IF tension, corresponding to Figure 6A. Scale bar, 10 µm. The calibration bar was set from 0.1 to 1.5. **(C)** Cytoplasmic OP. **(D)** Normalized ratio of cell volume. **(E, F)** Normalized Ft/F0 ratio of intracellular Ca2+ and Cl− fluorescent intensities. The significant differences were statistically analyzed between the 1,2-DCE group compared with the control, the additional treatment of Sen A+TAX+Tran or 0 mM Ca2++heparin or HgCl2 individually compared with the 1,2-DCE group (B-F). Average of ≥3 biologically independent replicates ± SEM. ns, no significant, *p < 0.05, **p < 0.01, ***p < 0.001.


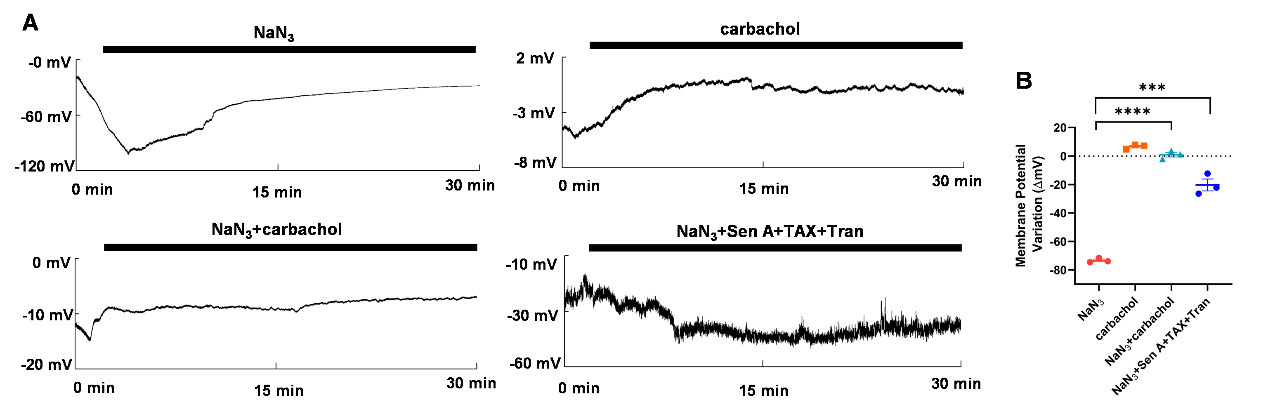


**Figure S4. Ca2+ and PNs mediate membrane potential transition in the NaN3-induced hyperpolarization model.** **(A)** Representative trace map and **(B)** variations in membrane potential measured using a whole-cell patch clamp. Carbachol was used as an agonist of IP3R. The significant differences were statistically analyzed between the additional treatment of carbachol or Sen A+TAX+Tran individually compared with the NaN3 group. Average of ≥3 biologically independent replicates ± SEM. ***p < 0.001, ****p < 0.0001.


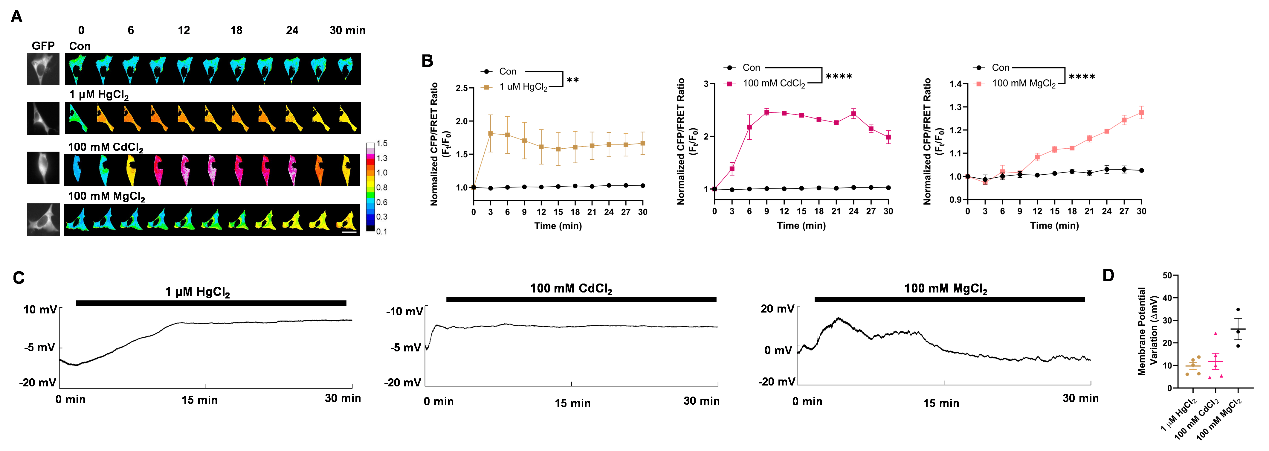


**Figure S5. Other divalent ions result in IF tension increase and membrane depolarization. (A)** Representative fluorescent images of vimentin IF tension recorded within 30 min. Scale bar, 10 µm.The calibration bar was set from 0.1 to 1.5. **(B)** Normalized CFP/FRET ratio of vimentin IF tension. **(C)** Representative trace map and **(D)** variations in membrane potential measured using a whole-cell patch clamp. Average of ≥3 biologically independent replicates ± SEM. **p < 0.01, ****p < 0.0001.


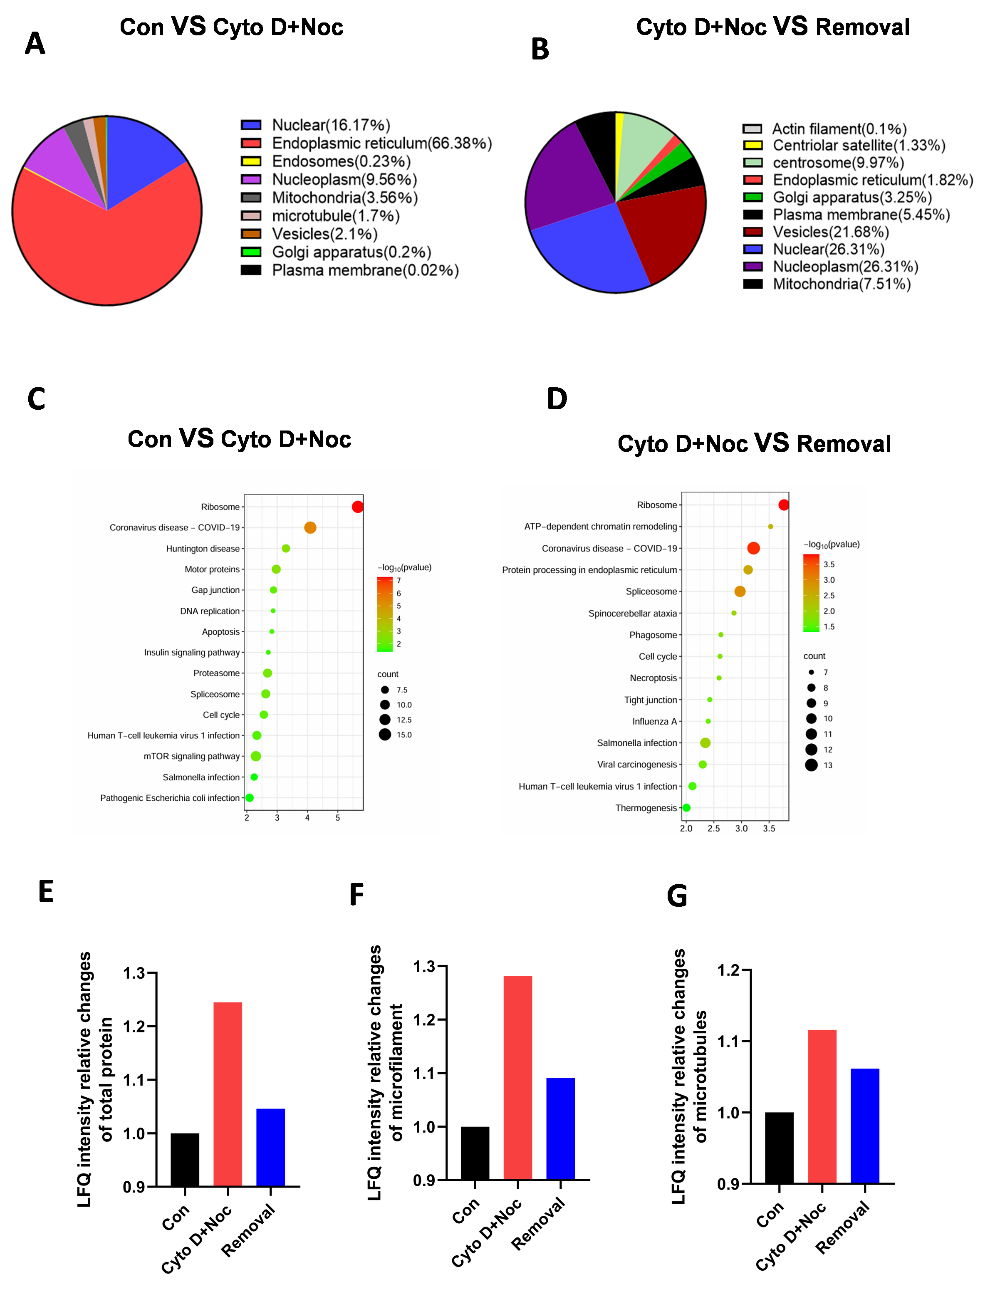


**Figure S6. Proteomic analysis by label-free LC–MS (supplementary to Figure 8).** **(A, B)** Relative number of identified proteins (LFQ response) analyzed by subcellular localization. The percentage in parentheses represents the enriched types of proteins. **(C, D)** KEGG enrichment analysis ranked by p-value. **(E)** Relative changes in label-free quantification intensity corresponding to total proteins, **(F)** microfilaments, and **(G)** microtubules.
